# Supplementary material
Source: PubMed Central journal article supplement (PMC8784964)

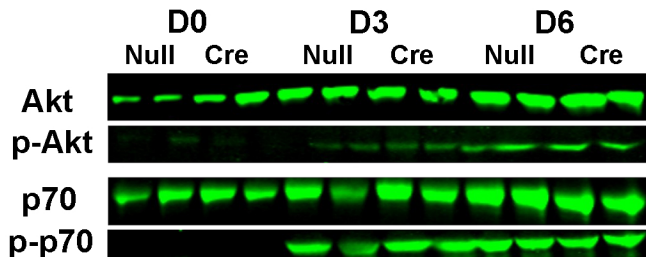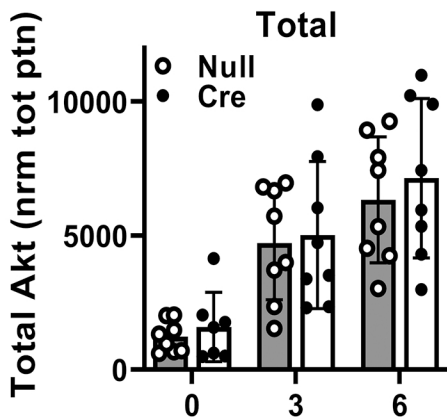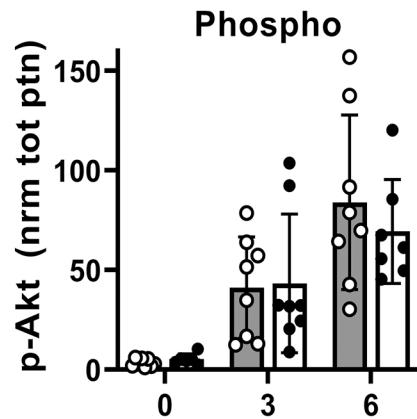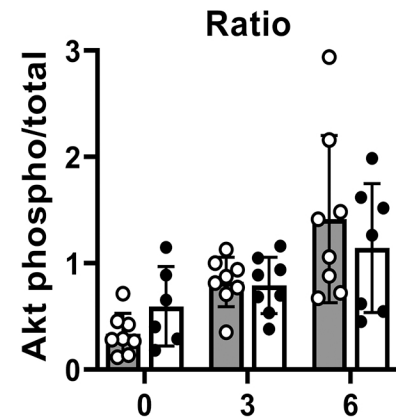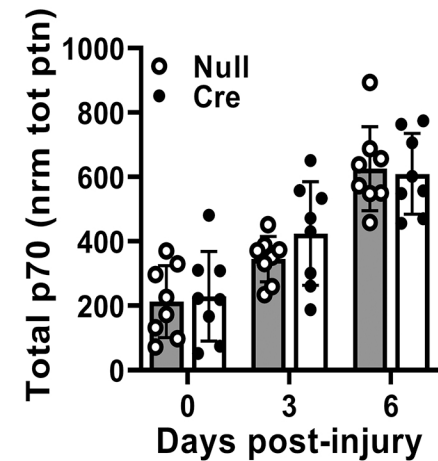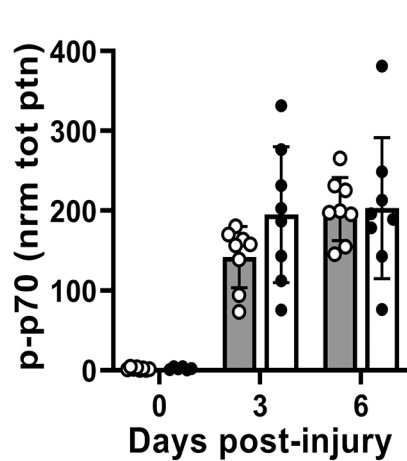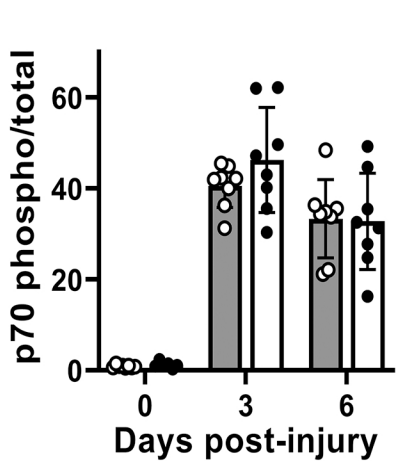

Supplement: NIHMS1771192-supplement-01.pdf [file NIHMS1771192-supplement-01.pdf]
